# Supplementary material
Source: PubMed Central journal article supplement (PMC2614166)
Supplement: rsbl20080402s25.pdf [file rsbl20080402s25.pdf]

| 5-year span | cl 1 | cl 2 | cl 3 | cl 4 | cl 5 | class | class | total | ratio | GLOBAL                          |       |      |      |
|-------------|------|------|------|------|------|-------|-------|-------|-------|---------------------------------|-------|------|------|
|             |      |      |      |      |      |       |       |       |       | 10-yr ratio                     | Total |      |      |
| 1825-9      | 2    | 0    | 0    | 0    | 0    | 2     | 0     | 2     | 0.00  |                                 |       |      |      |
| 1830-4      | 2    | 0    | 0    | 1    | 0    | 2     | 1     | 3     | 0.50  | 1825-34                         | 1830  | 0.25 | 5    |
| 1835-9      | 2    | 0    | 0    | 0    | 0    | 2     | 0     | 2     | 0.00  | 1835-44                         | 1840  | 0.00 | 21   |
| 1840-4      | 19   | 0    | 0    | 0    | 0    | 19    | 0     | 19    | 0.00  | 1845-54                         | 1850  | 0.00 | 15   |
| 1845-9      | 3    | 0    | 0    | 0    | 0    | 3     | 0     | 3     | 0.00  | 1855-64                         | 1860  | 0.22 | 22   |
| 1850-4      | 12   | 0    | 0    | 0    | 0    | 12    | 0     | 12    | 0.00  | 1865-74                         | 1870  | 0.09 | 59   |
| 1855-9      | 13   | 0    | 0    | 1    | 0    | 13    | 1     | 14    | 0.08  | 1875-84                         | 1880  | 0.11 | 133  |
| 1860-4      | 5    | 0    | 0    | 3    | 0    | 5     | 3     | 8     | 0.60  | 1885-94                         | 1890  | 0.33 | 84   |
| 1865-9      | 24   | 1    | 0    | 0    | 0    | 24    | 1     | 25    | 0.04  | 1895-1904                       | 1900  | 0.42 | 47   |
| 1870-4      | 30   | 0    | 0    | 2    | 2    | 30    | 4     | 34    | 0.13  | 1905-14                         | 1910  | 0.97 | 71   |
| 1875-9      | 88   | 1    | 0    | 7    | 1    | 88    | 9     | 97    | 0.10  | 1915-24                         | 1920  | 0.89 | 66   |
| 1880-4      | 31   | 1    | 0    | 2    | 1    | 31    | 4     | 35    | 0.13  | 1925-34                         | 1930  | 0.44 | 105  |
| 1885-9      | 33   | 7    | 0    | 2    | 1    | 33    | 10    | 43    | 0.30  | 1935-44                         | 1940  | 1.93 | 41   |
| 1890-4      | 30   | 5    | 0    | 6    | 0    | 30    | 11    | 41    | 0.37  | 1945-54                         | 1950  | 0.80 | 36   |
| 1895-9      | 15   | 1    | 0    | 3    | 0    | 15    | 4     | 19    | 0.27  | 1955-64                         | 1960  | 1.09 | 48   |
| 1900-4      | 18   | 2    | 2    | 2    | 4    | 18    | 10    | 28    | 0.56  | 1965-74                         | 1970  | 1.32 | 58   |
| 1905-9      | 19   | 3    | 0    | 6    | 3    | 19    | 12    | 31    | 0.63  | 1975-84                         | 1980  | 1.10 | 126  |
| 1910-4      | 17   | 5    | 1    | 11   | 6    | 17    | 23    | 40    | 1.35  | 1985-94                         | 1990  | 0.80 | 160  |
| 1915-9      | 15   | 1    | 1    | 7    | 3    | 15    | 12    | 27    | 0.80  | 1995-2004                       | 2000  | 1.34 | 297  |
| 1920-4      | 20   | 2    | 0    | 16   | 1    | 20    | 19    | 39    | 0.95  |                                 |       | 0.67 | 1394 |
| 1925-9      | 25   | 4    | 1    | 5    | 2    | 25    | 12    | 37    | 0.48  | Mean of ratios, from 1890s only |       |      |      |
| 1930-4      | 48   | 10   | 0    | 8    | 2    | 48    | 20    | 68    | 0.42  | First reputed dinosaur named    |       |      |      |
| 1935-9      | 5    | 6    | 1    | 6    | 0    | 5     | 13    | 18    | 2.60  | First actual dinosaur named     |       |      |      |
| 1940-4      | 9    | 5    | 1    | 6    | 2    | 9     | 14    | 23    | 1.56  | 0.95                            |       |      |      |
| 1945-9      | 8    | 4    | 0    | 2    | 0    | 8     | 6     | 14    | 0.75  |                                 |       |      |      |
| 1950-4      | 12   | 3    | 1    | 3    | 3    | 12    | 10    | 22    | 0.83  |                                 |       |      |      |
| 1955-9      | 8    | 4    | 0    | 10   | 0    | 8     | 14    | 22    | 1.75  |                                 |       |      |      |
| 1960-4      | 15   | 3    | 0    | 8    | 0    | 15    | 11    | 26    | 0.73  |                                 |       |      |      |
| 1965-9      | 6    | 1    | 0    | 6    | 1    | 6     | 8     | 14    | 1.33  |                                 |       |      |      |
| 1970-4      | 19   | 5    | 0    | 14   | 6    | 19    | 25    | 44    | 1.32  |                                 |       |      |      |
| 1975-9      | 24   | 12   | 2    | 12   | 9    | 24    | 35    | 59    | 1.46  |                                 |       |      |      |
| 1980-4      | 36   | 7    | 0    | 13   | 11   | 36    | 31    | 67    | 0.86  |                                 |       |      |      |
| 1985-9      | 39   | 6    | 2    | 10   | 8    | 39    | 26    | 65    | 0.67  |                                 |       |      |      |
| 1990-4      | 50   | 9    | 0    | 32   | 4    | 50    | 45    | 95    | 0.90  |                                 |       |      |      |
| 1995-9      | 78   | 10   | 2    | 50   | 13   | 78    | 75    | 153   | 0.96  |                                 |       |      |      |
| 2000-4      | 49   | 18   | 4    | 59   | 14   | 49    | 95    | 144   | 1.94  |                                 |       |      |      |
| TOTALS      | 829  | 136  | 18   | 313  | 97   | 829   | 564   | 1393  |       |                                 |       |      |      |

| EUROPE      |       | AFRICA      |       | NORTH AMERICA |       | ASIA        |       | SOUTH AMERICA |       | AUSTRALASIA |       |
|-------------|-------|-------------|-------|---------------|-------|-------------|-------|---------------|-------|-------------|-------|
| 10-yr ratio | Total | 10-yr ratio | Total | 10-yr ratio   | Total | 10-yr ratio | Total | 10-yr ratio   | Total | 10-yr ratio | Total |
| 0.10        | 5     |             |       |               |       |             |       |               |       |             |       |
| 0.00        | 21    |             |       |               |       |             |       |               |       |             |       |
| 0.00        | 10    | 0.00        | 3     | 0.00          | 2     |             |       |               |       |             |       |
| 0.28        | 14    | 0.00        | 1     | 0.00          | 7     |             |       |               |       |             |       |
| 0.08        | 27    | 0.00        | 1     | 0.11          | 30    | 0.00        | 1     |               |       |             |       |
| 0.11        | 62    | 0.00        | 3     | 0.12          | 65    | 0.00        | 2     |               |       |             |       |
| 0.09        | 24    | 0.00        | 2     | 0.58          | 52    | 0.00        | 2     | 0.00          | 4     |             |       |
| 0.11        | 20    | 0.00        | 4     | 0.60          | 20    | 0.00        | 0     | 0.00          | 3     |             |       |
| 0.02        | 32    | 0.86        | 13    | 0.24          | 26    | 0.00        | 0     | 0.00          | 0     |             |       |
| 0.33        | 8     | 0.58        | 19    | 1.90          | 29    | 2.00        | 9     | 0.00          | 1     |             |       |
| 0.08        | 27    | 0.00        | 14    | 2.33          | 30    | 0.04        | 23    | 0.12          | 9     | 0.00        | 2     |
| 0.00        | 1     | 0.00        | 0     | 4.75          | 23    | 1.00        | 16    | 0.00          | 1     | 0.00        | 0     |
| 0.00        | 1     | 0.00        | 2     | 3.00          | 12    | 0.54        | 20    | 0.00          | 1     | 0.00        | 0     |
| 1.33        | 7     | 0.33        | 12    | 0.43          | 10    | 3.00        | 16    | 3.00          | 3     | 0.00        | 0     |
| 0.50        | 9     | 0.50        | 9     | 2.50          | 7     | 4.00        | 20    | 0.62          | 13    | 0.00        | 0     |
| 0.29        | 9     | 1.50        | 5     | 1.25          | 18    | 1.03        | 79    | 3.33          | 13    | 1.00        | 2     |
| 0.58        | 19    | 1.00        | 6     | 1.17          | 39    | 0.76        | 74    | 0.40          | 18    | 0.00        | 4     |
| 0.81        | 29    | 1.71        | 19    | 1.00          | 60    | 1.94        | 153   | 0.67          | 35    | 0.00        | 1     |
| 0.26        | 325   | 0.41        | 113   | 1.25          | 430   | 1.02        | 415   | 0.68          | 101   | 0.13        | 9     |
| 0.35        |       | 0.54        |       | 1.65          |       | 1.19        |       | 0.68          |       |             |       |
| 1824        |       | 1854        |       | 1856          |       | 1865        |       | 1893          |       | 1891        |       |
| 1824        |       | 1854        |       | 1858          |       | 1877        |       | 1893          |       | 1924        |       |
