# Supplementary material
Source: PubMed Central journal article supplement (PMC2614166)
Supplement: rsbl20080402s26.pdf [file rsbl20080402s26.pdf]

Benton Supplementary Figure 1

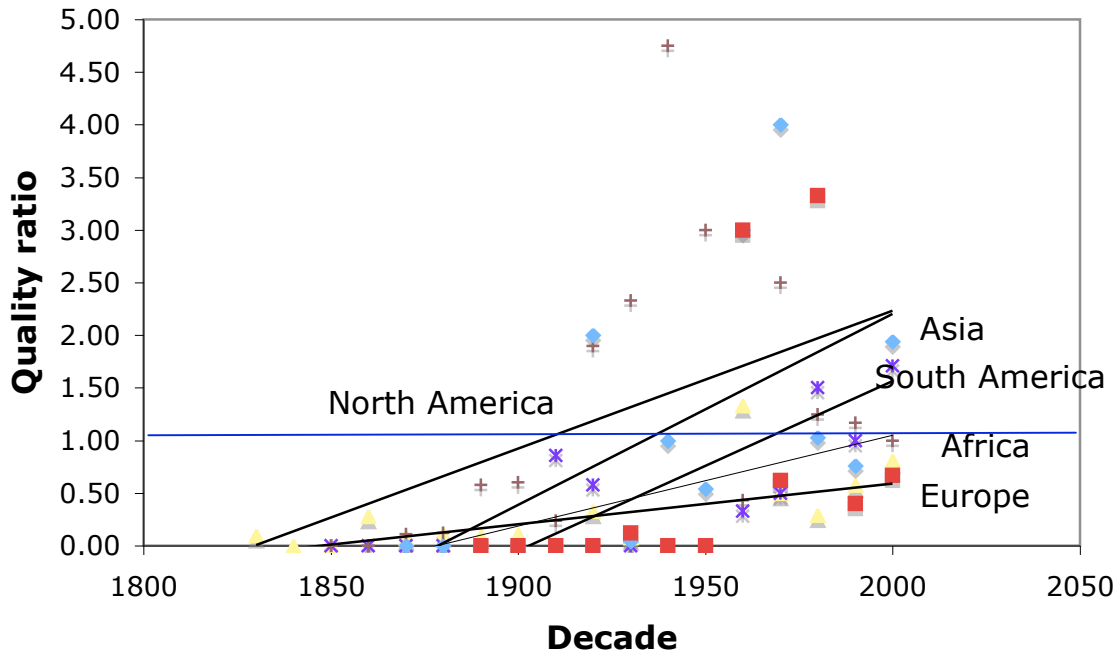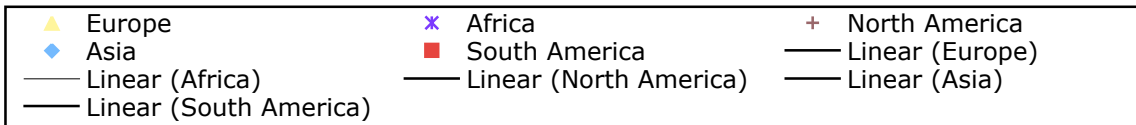

Supplementary Figure 1. The quality ratio (numbers of type specimens based on complete skulls or skeletons over numbers of incomplete specimens) for dinosaurs named from five major continents. [Numbers from Australia and Antarctica are too low to analyse.] The blue line at  $y = 1.00$  marks the cross-over point at which more type species of dinosaurs were based on complete than incomplete materials. Straight line fits are rough approximations of the best fitting line for each continent. In order of slope, these run from Europe, Africa, North America, South America, and Asia. Dinosaurs from Europe and Africa have always been based more on incomplete than complete materials (the line does not cross  $y = 1.00$ ).
